# Supplementary material for: The Impact of Bilirubin on 7α- and 7β- Hydroxysteroid Dehydrogenases: Spectra and Docking Analysis
Source: Preprints.org preprint supplement (doi:10.20944/preprints202304.0561.v1), 2023-04-19
Supplement: Supplementary file 1 [file supplementary]

## Supplementary Material

### Supplementary material 1

#### The protocol of the expression and purifications of 7 $\alpha$ -HSDH or 7 $\beta$ -HSDH.

The *E. coli* BL<sub>21</sub> (DE<sub>3</sub>) strains with 7 $\alpha$ -HSDH or 7 $\beta$ -HSDH recombinant plasmids were cultured at 37 °C, 220 rpm in Luria-Bertani (LB) medium containing 100 mg mL<sup>-1</sup> ampicillin. IPTG was added to a final concentration of 0.2 mM until the OD<sub>600</sub> reached 0.7-0.8. The recombinant cells were harvested by centrifugation and wall-cracking achieved by sonication. Target protein in supernatant bound with Glutathione Sepharose 4B using GST tag. 7 $\alpha$ -HSDH or 7 $\beta$ -HSDH was eluted from columns after prescission protease digestion. The purity of the recombinant protein was confirmed by 12 % polyacrylamide gel electrophoresis (SDS-PAGE). Protein concentration was determined using the BCA protein assay Kit.

### Supplementary material 2

#### The synthetic procedure of T-7-KLCA

To a magnetically stirred solution of 7-KLCA (0.25 mmol) in dry dimethylformamide (DMF; 1 mL) were added successively powdered taurine (0.5 mmol), diethyl phosphorocyanidate (DEPC 0.3 mmol), and anhydrous triethylamine (Et<sub>3</sub>N 0.4 mL), and the resulting suspension was stirred at room temperature for 60 min (the reaction was monitored by HPLC). The reaction mixture was adjusted to pH 12–14 with 1 M NaOH and then to pH 7–8 with 10% HCl. The solution was diluted with water (9 mL), passed through a preconditioned Sep-PakVac tC18 cartridge, and eluted successively with water (20 mL), 25% CH<sub>3</sub>CH<sub>2</sub>OH (20 mL), and CH<sub>3</sub>CH<sub>2</sub>OH (25 mL). The last fraction containing the desired taurine conjugate sodium salt was evaporated to dryness under a nitrogen stream, and the residue was recrystallized from an appropriate solvent. (Reference: T. Momose, T. Tsubaki, T. Iida, T. Nambara, An improved synthesis of taurine- and glycine-conjugated bile acids, *Lipids*, 32 (1997) 775-778.)

### Supplementary material 3

#### The fitting formulas for TCDCA, T-7-KLCA and TUDCA

Table S1 The fitting formulas for TCDCA, T-7-KLCA and TUDCA

| Bile acid | Fitting formula    | $R^2$  |
|-----------|--------------------|--------|
| TCDCA     | $y = 1.60x + 3.80$ | 0.9998 |
| T-7-KLCA  | $y = 1.53x + 4.73$ | 0.9999 |
| TUDCA     | $y = 1.61x + 4.46$ | 0.9989 |

TCDCA, T-7-KLCA and TUDCA were dissolved in methanol and analyzed by HPLC-ELSD with at following different concentrations: 0.12 mg·mL<sup>-1</sup>, 0.24 mg·mL<sup>-1</sup>, 0.36 mg·mL<sup>-1</sup>, 0.48 mg·mL<sup>-1</sup> and 0.60 mg·mL<sup>-1</sup>. The constant flow rate was 0.8 mL·min<sup>-1</sup>, and a linear gradient elution was used.

## Supplementary material 4

Table S2 The low energy conformation of combination between bilirubin and 7 $\alpha$ -HSDH

| Num-<br>ber | Binding energy<br>(kcal/mol) | Van der Waals force + Hydro-<br>gen bond + Desolvation energy<br>(kcal/mol) | Electrostatic interac-<br>tion<br>(kcal/mol) |
|-------------|------------------------------|-----------------------------------------------------------------------------|----------------------------------------------|
| 1           | -4.71                        | -6.17                                                                       | -0.77                                        |
| 2           | -4.67                        | -5.03                                                                       | -1.64                                        |
| 3           | -4.6                         | -5.17                                                                       | -1.9                                         |
| 4           | -4.55                        | -4.46                                                                       | -2.33                                        |
| 5           | -4.39                        | -5.65                                                                       | -0.01                                        |
| 6           | -4.35                        | -5.27                                                                       | -1.31                                        |
| 7           | -4.31                        | -4.38                                                                       | -1.25                                        |
| 8           | -4.27                        | -4.21                                                                       | -1.57                                        |
| 9           | -4.16                        | -5.3                                                                        | -0.96                                        |
| 10          | -4.07                        | -4.87                                                                       | -1.13                                        |

Table S3 The low energy conformation of combination between bilirubin and 7 $\beta$ -HSDH

| Num-<br>ber | Binding energy<br>(kcal/mol) | Van der Waals force + Hydro-<br>gen bond + Desolvation energy | Electrostatic interac-<br>tion |
|-------------|------------------------------|---------------------------------------------------------------|--------------------------------|
|-------------|------------------------------|---------------------------------------------------------------|--------------------------------|

|    |       | (kcal/mol) | (kcal/mol) |
|----|-------|------------|------------|
| 1  | -5.79 | -5.57      | -1.69      |
| 2  | -5.62 | -4.72      | -1.58      |
| 3  | -5.39 | -5.41      | -1.55      |
| 4  | -4.97 | -5.41      | -1.61      |
| 5  | -4.91 | -5.27      | -1.18      |
| 6  | -4.68 | -5.42      | -0.86      |
| 7  | -4.83 | -4.81      | -2.31      |
| 8  | -4.8  | -4.66      | -2.18      |
| 9  | -4.74 | -4.32      | -2.6       |
| 10 | -4.32 | -3.67      | -2.63      |

## Supplementary material 5

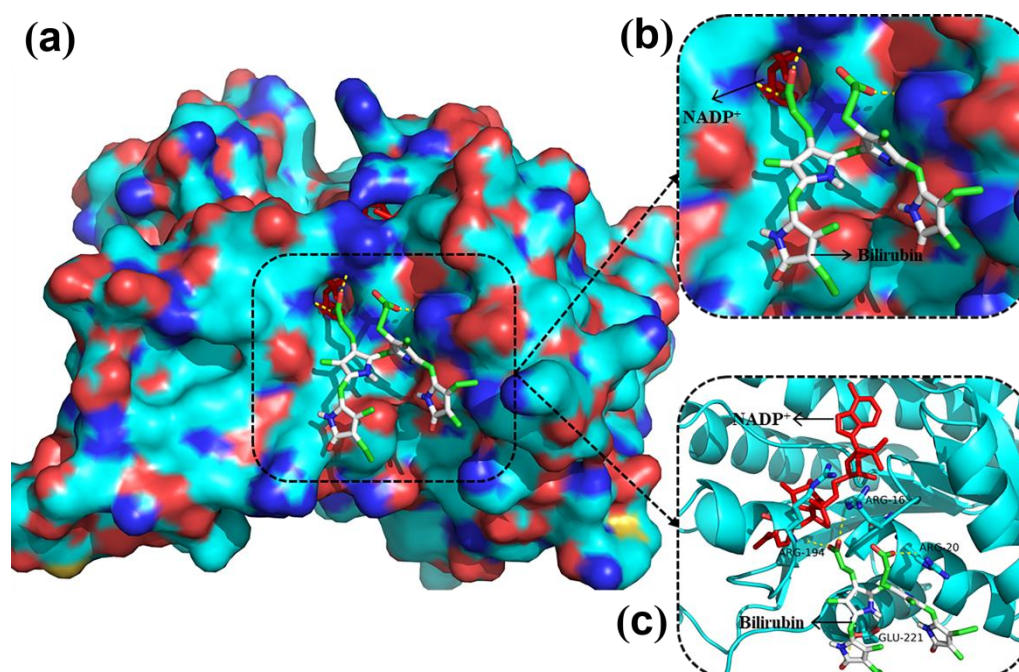

**Figure S1.** The docking simulation of bilirubin and 7α-HSDH. **(a)** The overview of combination between bilirubin and 7α-HSDH; **(b)** The relative positions of cofactor NADP<sup>+</sup> and bilirubin; **(c)** The specific amino acid residues of 7α-HSDH

combined with bilirubin. Molecular docking was performed on autodock 4.2 and the results were analyzed by VMD1.8.3.

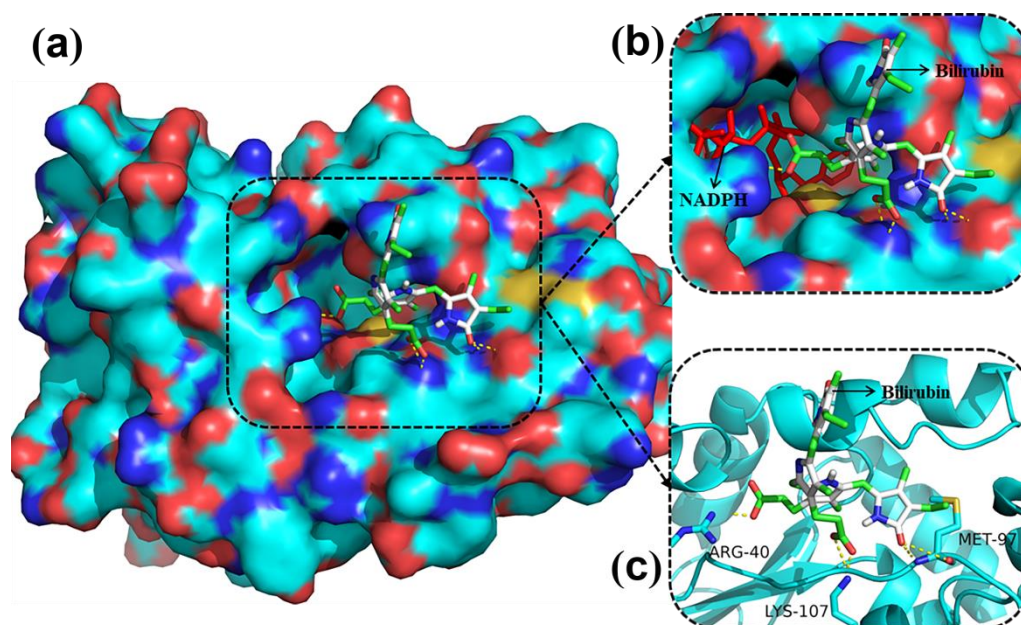

**Figure S2.** The docking simulation of bilirubin and 7β-HSDH. **(a)** The overview of combination between bilirubin and 7β-HSDH; **(b)** The relative positions of cofactor NADPH and bilirubin; **(c)** the specific amino acid residues of 7β-HSDH combined with bilirubin. Molecular docking was performed on autodock 4.2 and the results were analyzed by VMD1.8.3.
